# Supplementary material for: Colistin resistance in Gram-negative bacteria analysed by five phenotypic assays and inference of the underlying genomic mechanisms
Source: Research Square preprint supplement (doi:10.21203/rs.3.rs-610993/v1), 2021-06-14
Supplement: Supplementary file 1 [file d810a29ffef150dc715507bb.docx]

Additional file 2. Different phenotypic assays used for colistin susceptibility testing: UMIC, E-Test and Rapid Polymyxin NP Test.
